# Supplementary material
Source: publisher figshare collection journal article supplement (https://acs.figshare.com/ndownloader/files/22693700)
Supplement: Supplementary file 1 [file 22693700]

## **Supporting Information**

### **Real-time Monitoring of the Effects of Personal Temperature Exposure on Blood Oxygen Saturation Level in Elderly People With and Without Chronic Obstructive Pulmonary Disease: A Panel Study in Hong Kong**

Hong Qiu<sup>1</sup>, Xi Xia<sup>2</sup>, Chung Ling Man<sup>2</sup>, Fanny W Ko<sup>3</sup>, Steve HL Yim<sup>1,4</sup>, Timothy CY Kwok<sup>5</sup>, Kin-Fai Ho<sup>1,2\*</sup>

<sup>1</sup> Institute of Environment, Energy and Sustainability, The Chinese University of Hong Kong, HKSAR, China. <sup>2</sup> School of Public Health and Primary Care, The Chinese University of Hong Kong, HKSAR, China. <sup>3</sup> Division of Respiratory Medicine, Faculty of Medicine, The Chinese University of Hong Kong, HKSAR, China. <sup>4</sup> Department of Geography and Resource Management, The Chinese University of Hong Kong, HKSAR, China. <sup>5</sup> Department of Medicine & Therapeutics, Faculty of Medicine, The Chinese University of Hong Kong, HKSAR, China.

\*: Corresponding author, email: [kfho@cuhk.edu.hk](mailto:kfho@cuhk.edu.hk)

#### **Tables of contents**

Table S1 Description for individual Characteristics for three subgroups of participants

Table S2 Description for SpO<sub>2</sub>, the personal exposure to ambient temperature and environmental factors for three subgroups of participants

Table S3 Changes in SpO<sub>2</sub> (%) and OR of oxygen desaturation associated with 1°C increase of real-time personal temperature exposure at different lag periods by season

Figure S1: Diurnal variation of personal physical activity and SpO<sub>2</sub> levels averaged from all participants

Figure S2 Exposure-response relationships between the change in SpO<sub>2</sub> and each environmental exposure

Figure S3 Exposure-response relationships between the change in SpO<sub>2</sub> and personal temperature exposure at different lags

Figure S4 Distribution of personal temperature exposure among healthy men, women and COPD men, respectively. (The vertical dotted line is the mean value of temperature)

Questionnaire on medical history and medication (page S7).

**Table S1 Description for individual Characteristics for three subgroups of participants**

| <b>Variable</b>                                 | <b>Total</b> | <b>Healthy men</b> | <b>Healthy women</b> | <b>Male COPD patients</b> |
|-------------------------------------------------|--------------|--------------------|----------------------|---------------------------|
| <b>Number of participants, N</b>                | 40           | 8                  | 12                   | 18                        |
| <b>Number of measurements, n</b>                | 25,192       | 5,102              | 6,750                | 12,043                    |
| <b>SpO<sub>2</sub> (%)<sup>a</sup>, mean±SD</b> | 92.0 ± 5.3   | 94.4 ± 4.0         | 93.0 ± 4.7           | 90.7 ± 5.6                |
| <b>Oxygen desaturation, (%)</b>                 | 28.6         | 12.3               | 22.1                 | 37.6                      |
| <b>Physical activity<sup>b</sup></b>            |              |                    |                      |                           |
| <b>VM (cpm)<sup>a</sup>, median (IQR)</b>       | 919 (1,693)  | 841 (1,725)        | 1,323 (2,475)        | 856 (1,416)               |
| <b>Mild, (%)</b>                                | 33.3         | 34.8               | 25.4                 | 34.9                      |
| <b>Medium, (%)</b>                              | 33.3         | 33.0               | 29.9                 | 35.8                      |
| <b>Intense, (%)</b>                             | 33.3         | 32.1               | 44.7                 | 29.3                      |

Abbreviations: SpO<sub>2</sub>, pulse oxygen saturation; VM, vector magnitude; cpm, counts per minute; IQR, interquartile range; SD, standard deviation.

a: SpO<sub>2</sub> were real-time monitored by sensors, calculated from 25,192 repeated measurements for 20 patients with COPD and 20 healthy participants.

b: VM is the indicator of physical activity; three physical activity levels (mild, medium and intense) were categorized using the 33.3 and 66.7 percentiles as the cut-off points (548.8 and 1571.4 VM cpm, respectively).

**Table S2 Description for SpO<sub>2</sub>, the personal exposure to ambient temperature and environmental factors for three subgroups of participants \***

|                                        | Mean   | SD   | Min    | P <sub>25</sub> | Median | P <sub>75</sub> | Max    | IQR  |
|----------------------------------------|--------|------|--------|-----------------|--------|-----------------|--------|------|
| <b>Healthy men (n=5,102)</b>           |        |      |        |                 |        |                 |        |      |
| SpO <sub>2</sub> (%)                   | 94.4   | 4.0  | 69.0   | 92.8            | 95.3   | 97.2            | 100    | 4.4  |
| Temperature (°C)                       | 28.8   | 2.3  | 23.8   | 26.7            | 29.2   | 31.0            | 33.3   | 4.3  |
| PM <sub>2.5</sub> (µg/m <sup>3</sup> ) | 15.9   | 12.8 | 0      | 5.4             | 15.4   | 23.4            | 156.1  | 18   |
| CO (ppm)                               | 0.48   | 0.14 | 0.23   | 0.38            | 0.46   | 0.57            | 0.9    | 0.19 |
| Air pressure (hPa)                     | 1007.7 | 5.1  | 987.1  | 1005            | 1008.5 | 1010.2          | 1020.7 | 5.2  |
| Relative humidity (%)                  | 58.6   | 9.3  | 30.8   | 53.4            | 61.2   | 65.5            | 80.4   | 12.1 |
| <b>Healthy women (n=6,750)</b>         |        |      |        |                 |        |                 |        |      |
| SpO <sub>2</sub> (%)                   | 93.0   | 4.7  | 69.0   | 90.5            | 94.0   | 96.4            | 100    | 5.9  |
| Temperature (°C)                       | 28.5   | 2.8  | 18.2   | 26.9            | 28.8   | 30.9            | 34.2   | 4    |
| PM <sub>2.5</sub> (µg/m <sup>3</sup> ) | 23.3   | 20.1 | 0      | 11.5            | 16.8   | 31.2            | 184.8  | 19.7 |
| CO (ppm)                               | 0.48   | 0.12 | 0.25   | 0.41            | 0.46   | 0.53            | 0.96   | 0.12 |
| Air pressure (hPa)                     | 1008.6 | 4.4  | 996.1  | 1006.6          | 1008.6 | 1011.8          | 1017.5 | 5.2  |
| Relative humidity (%)                  | 55.5   | 9.4  | 33.8   | 48.5            | 55.3   | 62.9            | 85.5   | 14.4 |
| <b>Male COPD patients (n=12,043)</b>   |        |      |        |                 |        |                 |        |      |
| SpO <sub>2</sub> (%)                   | 90.7   | 5.6  | 69.0   | 87.7            | 91.8   | 95.0            | 100    | 7.3  |
| Temperature (°C)                       | 27.6   | 3.8  | 16.8   | 25.9            | 28.6   | 30.3            | 33.7   | 4.4  |
| PM <sub>2.5</sub> (µg/m <sup>3</sup> ) | 27.3   | 21.8 | 1.5    | 13.5            | 21.2   | 33.7            | 185.6  | 20.2 |
| CO (ppm)                               | 0.48   | 0.15 | 0.19   | 0.36            | 0.47   | 0.59            | 1.13   | 0.23 |
| Air pressure (hPa)                     | 1011.3 | 6.2  | 1000.1 | 1006.7          | 1010.8 | 1014.5          | 1029.3 | 7.8  |
| Relative humidity (%)                  | 52.8   | 10.0 | 17.6   | 46.8            | 53.3   | 59.2            | 82.5   | 12.4 |

\*: Data of SpO<sub>2</sub>, PM<sub>2.5</sub>, temperature and relative humidity were real-time monitoring by sensors, averaged from 13,340 repeated measurements for 20 patients with COPD and 11,852 repeated measurements for 20 healthy participants. Abbreviations: SpO<sub>2</sub>, pulse oxygen saturation; SD, standard deviation; P<sub>25</sub>, the 25<sup>th</sup> percentile; P<sub>75</sub>, the 75<sup>th</sup> percentile; IQR, interquartile range.

**Table S3 Changes in SpO<sub>2</sub> (%) and OR of oxygen desaturation associated with 1°C increase of real-time personal temperature exposure at different lag periods by season \***

| Temperature                      | Whole year<br>(n=25,192) | Warm season <sup>a</sup><br>(n=17,932) | Cool season <sup>a</sup><br>(n=7,260) | P-value <sup>b</sup> |
|----------------------------------|--------------------------|----------------------------------------|---------------------------------------|----------------------|
| Changes in SpO <sub>2</sub>      |                          |                                        |                                       |                      |
| Lag 0 (5min)                     | -0.27 ( -0.32 , -0.22 )  | -0.25 ( -0.30 , -0.19 )                | -0.35 ( -0.51 , -0.18 )               | 0.0246               |
| Lag 0-30m                        | -0.25 ( -0.30 , -0.20 )  | -0.22 ( -0.28 , -0.17 )                | -0.35 ( -0.52 , -0.19 )               | 0.0084               |
| Lag 0-1h                         | -0.23 ( -0.29 , -0.18 )  | -0.20 ( -0.25 , -0.15 )                | -0.37 ( -0.54 , -0.20 )               | 0.0018               |
| Lag 0-3h                         | -0.18 ( -0.23 , -0.12 )  | -0.15 ( -0.20 , -0.09 )                | -0.42 ( -0.60 , -0.25 )               | 0.0049               |
| Lag 0-5h                         | -0.11 ( -0.17 , -0.06 )  | -0.11 ( -0.17 , -0.05 )                | -0.32 ( -0.53 , -0.11 )               | 0.0522               |
| Lag 0-8h                         | -0.06 ( -0.12 , 0.01 )   | -0.07 ( -0.14 , 0.00 )                 | -0.26 ( -0.49 , -0.03 )               | 0.1213               |
| Oxygen desaturation <sup>c</sup> |                          |                                        |                                       |                      |
| Lag 0 (5min)                     | 1.14 ( 1.10 , 1.18 )     | 1.11 ( 1.06 , 1.15 )                   | 1.28 ( 1.17 , 1.40 )                  | 0.0026               |
| Lag 0-30m                        | 1.12 ( 1.09 , 1.16 )     | 1.09 ( 1.05 , 1.13 )                   | 1.28 ( 1.17 , 1.40 )                  | 0.0014               |
| Lag 0-1h                         | 1.11 ( 1.08 , 1.15 )     | 1.08 ( 1.04 , 1.12 )                   | 1.28 ( 1.16 , 1.41 )                  | 0.0010               |
| Lag 0-3h                         | 1.06 ( 1.03 , 1.10 )     | 1.04 ( 1.00 , 1.08 )                   | 1.18 ( 1.07 , 1.30 )                  | 0.0172               |
| Lag 0-5h                         | 1.03 ( 0.99 , 1.07 )     | 1.02 ( 0.98 , 1.07 )                   | 1.11 ( 1.01 , 1.23 )                  | 0.1223               |
| Lag 0-8h                         | 0.99 ( 0.95 , 1.03 )     | 0.98 ( 0.93 , 1.03 )                   | 1.08 ( 0.97 , 1.21 )                  | 0.1235               |

\*: Temperature at different lag exposure window was included in the GAMM model one at a time, adjusting for seasonality, personal exposure to PM<sub>2.5</sub> and relative humidity at lag 0-1h, ambient CO, air pressure, and individual characteristics.

<sup>a</sup>: We defined the warm season when data measured between April and September while the other months as the cool season.

<sup>b</sup>: P-values were got from the significance test when comparing between seasons for temperature exposure at the same lags.

<sup>c</sup>: Oxygen desaturation was defined as SpO<sub>2</sub> < 90%.

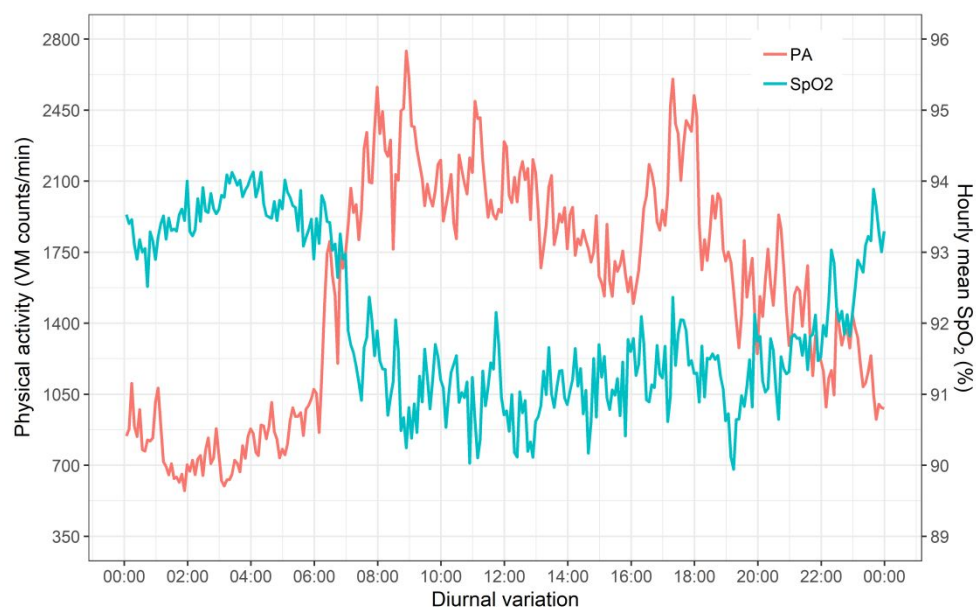

**Figure S1: Diurnal variation of personal physical activity and SpO<sub>2</sub> levels averaged from all participants**

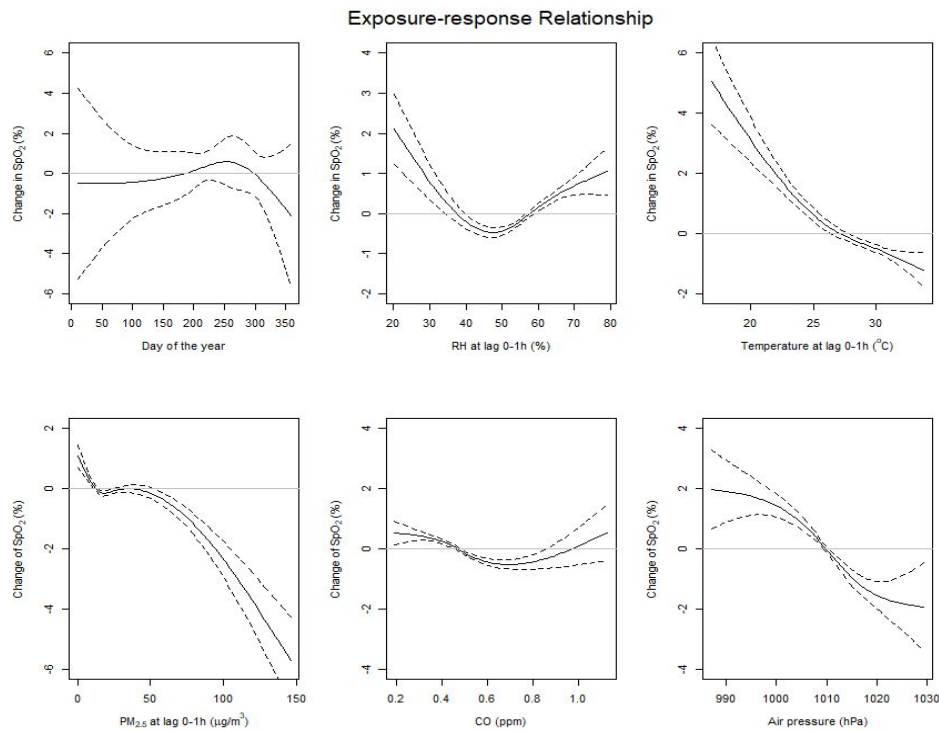

**Figure-s2 Exposure-response relationships between the change in SpO<sub>2</sub> and each environmental exposure**

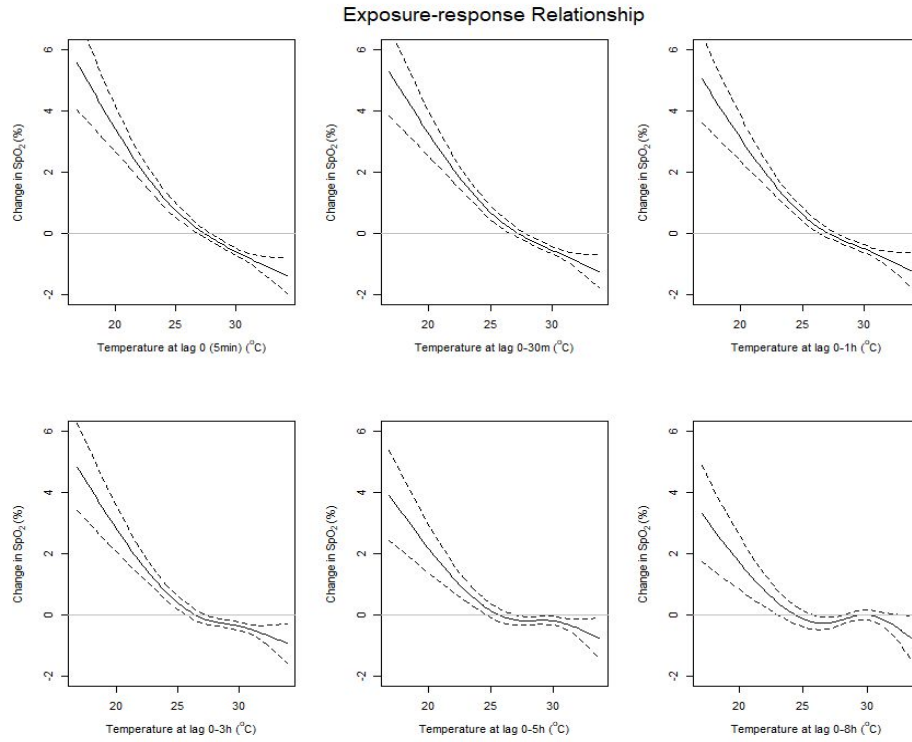

**Figure S3 Exposure-response relationships between the change in SpO<sub>2</sub> and personal temperature exposure at different lags**

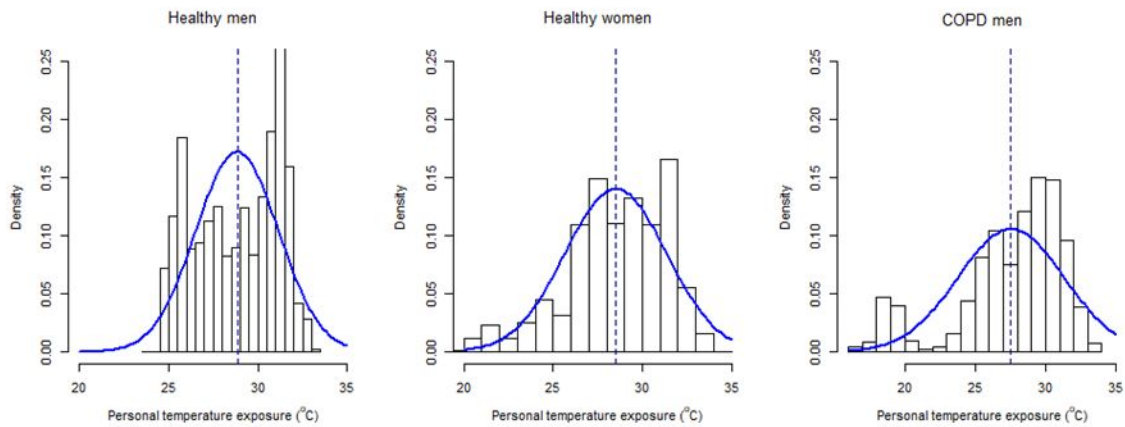

**Figure S4 Distribution of personal temperature exposure among healthy men, women and COPD men, respectively. (The vertical dotted line is the mean value of temperature)**

## Questionnaire on Medical history and Medication

### Medical history

- Have a doctor or other medical staff ever said that you had the following diseases?

|                                                                                 |                           |                          |
|---------------------------------------------------------------------------------|---------------------------|--------------------------|
| Diabetes Mellitus?                                                              | <input type="radio"/> Yes | <input type="radio"/> No |
| High thyroid hormone, Graves' disease (exophthalmopathy) or overactive thyroid? | <input type="radio"/> Yes | <input type="radio"/> No |
| Low thyroid hormone or inactive thyroid?                                        | <input type="radio"/> Yes | <input type="radio"/> No |
| Stroke, ischemia or hemorrhage?                                                 | <input type="radio"/> Yes | <input type="radio"/> No |
| Parkinson's disease?                                                            | <input type="radio"/> Yes | <input type="radio"/> No |
| Hypertension?                                                                   | <input type="radio"/> Yes | <input type="radio"/> No |
| Heart attack, coronary or myocardial infarction?                                | <input type="radio"/> Yes | <input type="radio"/> No |
| Angina pectoris?                                                                | <input type="radio"/> Yes | <input type="radio"/> No |
| Congestive heart failure or enlarged heart?                                     | <input type="radio"/> Yes | <input type="radio"/> No |
| COPD, chronic bronchitis, asthma or emphysema?                                  | <input type="radio"/> Yes | <input type="radio"/> No |
| Glaucoma?                                                                       | <input type="radio"/> Yes | <input type="radio"/> No |
| Cataract?                                                                       | <input type="radio"/> Yes | <input type="radio"/> No |

### Medication or Supplements

- Do you take medicines or other healthy foods such as vitamins, supplements, or Chinese herbal medicines every day?

Please list the medicines and supplements:

| Drugs/Chinese herbs/Supplements | Prescribed by a doctor?                            | How long to take? |
|---------------------------------|----------------------------------------------------|-------------------|
| a.                              | <input type="radio"/> Yes <input type="radio"/> No |                   |
| b.                              | <input type="radio"/> Yes <input type="radio"/> No |                   |
| c.                              | <input type="radio"/> Yes <input type="radio"/> No |                   |
| d.                              | <input type="radio"/> Yes <input type="radio"/> No |                   |
| e.                              | <input type="radio"/> Yes <input type="radio"/> No |                   |
| f.                              | <input type="radio"/> Yes <input type="radio"/> No |                   |
| g.                              | <input type="radio"/> Yes <input type="radio"/> No |                   |
| h.                              | <input type="radio"/> Yes <input type="radio"/> No |                   |
| i.                              | <input type="radio"/> Yes <input type="radio"/> No |                   |
| j.                              | <input type="radio"/> Yes <input type="radio"/> No |                   |
